# Supplementary material for: The impact of the COVID-19 epidemic on students’ mental health: A cross-sectional study
Source: PubMed Central journal article supplement (PMC9499216; doi:10.1371/journal.pone.0275167), 2022-09-22
Supplement: pone.0275167.s001.pdf [file pone.0275167.s001.pdf]

Associations of scales of depression, anxiety and stress with students socio-demographic variables, their medical studies and health status during the coronavirus pandemic – Results of multivariate logistic regression.

| Variable               | Multivariate logistic regression |       |                   |       |                   |        |
|------------------------|----------------------------------|-------|-------------------|-------|-------------------|--------|
|                        | Serious versus moderate          |       |                   |       |                   |        |
|                        | Depression scale                 |       | Anxiety scale     |       | Stress scale      |        |
|                        | OR (95%CI)                       | P     | OR (95%CI)        | P     | OR (95%CI)        | P      |
| <b>Gender</b>          |                                  |       |                   |       |                   |        |
| Male                   | 1.00 <sup>a</sup>                |       | 1.00 <sup>a</sup> |       | 1.00 <sup>a</sup> |        |
| Female                 | 1.56 (0.91-2.66)                 | 0.107 | 2.21 (1.09-4.49)  | 0.027 | 3.37 (1.70-6.68)  | <0.001 |
| <b>Age</b>             |                                  |       |                   |       |                   |        |
| ≤20                    | 1.00 <sup>a</sup>                |       | 1.00 <sup>a</sup> |       | 1.00 <sup>a</sup> |        |
| 21-30                  | 1.81 (0.61-5.44)                 | 0.288 | 0.59 (0.14-2.47)  | 0.467 | 1.82 (0.42-7.90)  | 0.424  |
| 31+                    | 0.37 (0.04-3.20)                 | 0.370 | 0.31 (0.02-5.10)  | 0.416 | 0.21 (0.02-2.20)  | 0.194  |
| <b>Year of studies</b> |                                  |       |                   |       |                   |        |
| First                  | 1.00 <sup>a</sup>                |       | 1.00 <sup>a</sup> |       | 1.00 <sup>a</sup> |        |
| Second                 | 0.53 (0.23-1.25)                 | 0.150 | 0.20 (0.03-1.14)  | 0.069 | 0.18 (0.05-0.69)  | 0.012  |
| Third                  | 0.32 (0.09-1.19)                 | 0.090 | 0.16 (0.02-1.40)  | 0.099 | 0.11 (0.02-0.71)  | 0.021  |
| Fourth                 | 0.26 (0.06-1.07)                 | 0.061 | 0.42 (0.04-4.25)  | 0.461 | 0.18 (0.02-1.46)  | 0.109  |
| Fifth                  | 0.12 (0.03-0.49)                 | 0.003 | 0.16 (0.02-1.49)  | 0.107 | 0.09 (0.01-0.71)  | 0.023  |
| Sixth                  | 0.21 (0.05-0.81)                 | 0.023 | 0.36 (0.04-3.32)  | 0.366 | 0.09 (0.01-0.71)  | 0.022  |

|                                        |                   |       |                   |       |                   |       |
|----------------------------------------|-------------------|-------|-------------------|-------|-------------------|-------|
| <b>Marital status</b>                  |                   |       |                   |       |                   |       |
| Single                                 | 1.00 <sup>a</sup> |       | 1.00 <sup>a</sup> |       | 1.00 <sup>a</sup> |       |
| Married/Living with a partner          | 1.05 (0.62-1.77)  | 0.868 | 1.34 (0.61-2.98)  | 0.466 | 2.01 (0.90-4.48)  | 0.088 |
| <b>Religious</b>                       |                   |       |                   |       |                   |       |
| Yes                                    | 1.00 <sup>a</sup> |       | 1.00 <sup>a</sup> |       | 1.00 <sup>a</sup> |       |
| No                                     | 1.50 (0.95-2.36)  | 0.083 | 1.10 (0.56-2.14)  | 0.786 | 1.36 (0.71-2.62)  | 0.359 |
| <b>Settlement type</b>                 |                   |       |                   |       |                   |       |
| Urban                                  | 1.00 <sup>a</sup> |       | 1.00 <sup>a</sup> |       | 1.00 <sup>a</sup> |       |
| Rural                                  | 1.33 (0.73-2.43)  | 0.358 | 1.40 (0.54-3.62)  | 0.494 | 0.57 (0.27-1.20)  | 0.140 |
| <b>Cohabitation during the studies</b> |                   |       |                   |       |                   |       |
| Alone                                  | 1.00 <sup>a</sup> |       | 1.00 <sup>a</sup> | 0.253 | 1.00 <sup>a</sup> |       |
| With family/room mate                  | 1.18 (0.70-2.01)  | 0.531 | 1.53 (0.74-3.16)  |       | 2.57 (1.31-5.03)  | 0.006 |
| <b>State of emergency</b>              |                   |       |                   |       |                   |       |
| In Belgrade                            | 1.00 <sup>a</sup> |       | 1.00 <sup>a</sup> |       | 1.00 <sup>a</sup> |       |
| Not in Belgrade/Serbia                 | 1.06 (0.68-1.66)  | 0.795 | 0.90 (0.46-1.75)  | 0.748 | 0.99 (0.52-1.89)  | 0.938 |

|                          |                   |       |                   |       |                   |       |
|--------------------------|-------------------|-------|-------------------|-------|-------------------|-------|
| <b>On-line lectures</b>  |                   |       |                   |       |                   |       |
| Few                      | 1.00 <sup>a</sup> |       | 1.00 <sup>a</sup> |       | 1.00 <sup>a</sup> |       |
| Moderate                 | 0.96 (0.58-1.61)  | 0.892 | 1.64 (0.76-3.56)  | 0.206 | 1.03 (0.50-2.13)  | 0.938 |
| Plenty                   | 0.55 (0.28-1.07)  | 0.077 | 0.83 (0.33-2.06)  | 0.687 | 0.52 (0.21-1.29)  | 0.157 |
| <b>Means of work</b>     |                   |       |                   |       |                   |       |
| Yes                      | 1.00 <sup>a</sup> |       | 1.00 <sup>a</sup> |       | 1.00 <sup>a</sup> |       |
| No                       | 0.75 (0.47-1.22)  | 0.247 | 0.68 (0.32-1.48)  | 0.335 | 0.94 (0.46-1.90)  | 0.857 |
| <b>COVID-19 infected</b> |                   |       |                   |       |                   |       |
| Yes                      | 1.00 <sup>a</sup> |       | 1.00 <sup>a</sup> |       | 1.00 <sup>a</sup> |       |
| No/not sure              | 0.88 (0.54-1.44)  | 0.617 | 0.99 (0.48-2.02)  | 0.974 | 0.80 (0.40-1.60)  | 0.530 |
| <b>General health</b>    |                   |       |                   |       |                   |       |
| Poor                     | 1.00 <sup>a</sup> |       | 1.00 <sup>a</sup> |       | 1.00 <sup>a</sup> |       |
| Average                  | /                 | 0.998 | /                 | 0.998 | /                 | 0.999 |
| Good                     | /                 | 0.998 | /                 | 0.998 | /                 | 0.999 |
| <b>Physical health</b>   |                   |       |                   |       |                   |       |
| Poor                     | 1.00 <sup>a</sup> |       | 1.00 <sup>a</sup> |       | 1.00 <sup>a</sup> |       |
| Average                  | 1.23 (0.26-5.92)  | 0.795 | 3.79 (0.52-27.49) | 0.187 | /                 | 0.998 |
| Good                     | 0.71 (0.14-3.57)  | 0.683 | 2.80 (0.36-21.68) | 0.324 | /                 | 0.998 |
| <b>Mental health</b>     |                   |       |                   |       |                   |       |

|         |                   |        |                   |       |                   |       |
|---------|-------------------|--------|-------------------|-------|-------------------|-------|
| Poor    | 1.00 <sup>a</sup> |        | 1.00 <sup>a</sup> |       | 1.00 <sup>a</sup> |       |
| Average | 0.06 (0.01-0.50)  | 0.009  | /                 | 0.996 | /                 | 0.996 |
| Good    | 0.01 (0.01-0.07)  | <0.001 | /                 | 0.996 | /                 | 0.996 |

a Reference category

Associations of scales of depression, anxiety and stress with students socio-demographic variables, their medical studies and health status during the coronavirus pandemic – Results of multivariate logistic regression with significant predictors in bivariate logistic regression.

| Variable               | Multivariate logistic regression |       |                   |       |                   |       |
|------------------------|----------------------------------|-------|-------------------|-------|-------------------|-------|
|                        | Serious versus moderate          |       |                   |       |                   |       |
|                        | Depression scale                 |       | Anxiety scale     |       | Stress scale      |       |
|                        | OR (95%CI)                       | P     | OR (95%CI)        | P     | OR (95%CI)        | P     |
| <b>Gender</b>          |                                  |       |                   |       |                   |       |
| Male                   |                                  |       | 1.00 <sup>a</sup> |       | 1.00 <sup>a</sup> |       |
| Female                 |                                  |       | 1.98 (1.04-3.77)  | 0.038 | 2.62 (1.44-4.77)  | 0.002 |
| <b>Age</b>             |                                  |       |                   |       |                   |       |
| ≤20                    | 1.00 <sup>a</sup>                |       | 1.00 <sup>a</sup> |       | 1.00 <sup>a</sup> |       |
| 21-30                  | 1.58 (0.53-4.66)                 | 0.408 | 0.30 (0.08-1.16)  | 0.082 | 0.99 (0.25-3.80)  | 0.983 |
| 31+                    | 0.45 (0.62-3.31)                 | 0.434 | 0.21 (0.02-2.66)  | 0.229 | 0.22 (0.03-1.63)  | 0.138 |
| <b>Year of studies</b> |                                  |       |                   |       |                   |       |
| First                  | 1.00 <sup>a</sup>                |       | 1.00 <sup>a</sup> |       | 1.00 <sup>a</sup> |       |

|                                        |                   |       |                  |       |                   |       |
|----------------------------------------|-------------------|-------|------------------|-------|-------------------|-------|
| Second                                 | 0.60 (0.26-1.38)  | 0.234 | 0.22 (0.04-1.13) | 0.070 | 0.29 (0.09-0.92)  | 0.036 |
| Third                                  | 0.44 (0.12-1.55)  | 0.201 | 0.38 (0.05-2.81) | 0.346 | 0.33 (0.60-1.77)  | 0.194 |
| Fourth                                 | 0.42 (0.11-1.57)  | 0.197 | 0.94 (0.11-7.76) | 0.953 | 0.60 (0.10-3.70)  | 0.581 |
| Fifth                                  | 0.18 (0.05-0.69)  | 0.012 | 0.31 (0.04-2.29) | 0.251 | 0.33 (0.06-1.88)  | 0.210 |
| Sixth                                  | 0.33 (0.09-1.18)  | 0.090 | 0.61 (0.08-4.56) | 0.634 | 0.28 (0.05-1.51)  | 0.139 |
| <b>Marital status</b>                  |                   |       |                  |       |                   |       |
| Single                                 |                   |       |                  |       |                   |       |
| Married/Living with a partner          |                   |       |                  |       |                   |       |
| <b>Religious</b>                       |                   |       |                  |       |                   |       |
| Yes                                    | 1.00 <sup>a</sup> |       |                  |       |                   |       |
| No                                     | 1.43 (0.92-2.22)  | 0.109 |                  |       |                   |       |
| <b>Settlement type</b>                 |                   |       |                  |       |                   |       |
| Urban                                  |                   |       |                  |       |                   |       |
| Rural                                  |                   |       |                  |       |                   |       |
| <b>Cohabitation during the studies</b> |                   |       |                  |       |                   |       |
| Alone                                  |                   |       |                  |       | 1.00 <sup>a</sup> |       |
| With family/room mate                  |                   |       |                  |       | 2.27 (1.26-4.06)  | 0.006 |

|                           |                   |       |  |  |  |  |
|---------------------------|-------------------|-------|--|--|--|--|
| <b>State of emergency</b> |                   |       |  |  |  |  |
| In Belgrade               |                   |       |  |  |  |  |
| Not in Belgrade/Serbia    |                   |       |  |  |  |  |
| <b>On-line lectures</b>   |                   |       |  |  |  |  |
| Few                       |                   |       |  |  |  |  |
| Moderate                  |                   |       |  |  |  |  |
| Plenty                    |                   |       |  |  |  |  |
| <b>Means of work</b>      |                   |       |  |  |  |  |
| Yes                       | 1.00 <sup>a</sup> |       |  |  |  |  |
| No                        | 0.71 (0.45-1.12)  | 0.144 |  |  |  |  |
| <b>COVID-19 infected</b>  |                   |       |  |  |  |  |
| Yes                       |                   |       |  |  |  |  |
| No/not sure               |                   |       |  |  |  |  |
| <b>General health</b>     |                   |       |  |  |  |  |
| Poor                      |                   |       |  |  |  |  |
| Average                   |                   |       |  |  |  |  |
| Good                      |                   |       |  |  |  |  |
| <b>Physical health</b>    |                   |       |  |  |  |  |

|                      |                   |        |  |  |  |  |
|----------------------|-------------------|--------|--|--|--|--|
| Poor                 | 1.00 <sup>a</sup> |        |  |  |  |  |
| Average              | 0.62 (0.15-2.44)  | 0.488  |  |  |  |  |
| Good                 | 0.34 (0.91-1.30)  | 0.116  |  |  |  |  |
| <b>Mental health</b> |                   |        |  |  |  |  |
| Poor                 | 1.00 <sup>a</sup> |        |  |  |  |  |
| Average              | 0.07 (0.01-0.52)  | 0.010  |  |  |  |  |
| Good                 | 0.10 (0.01-0.07)  | <0.001 |  |  |  |  |

a Reference category
